# Supplementary material for: Interplay between the Hsp90 Chaperone and the HslVU Protease To Regulate the Level of an Essential Protein in Shewanella oneidensis
Source: PubMed Central journal article supplement (PMC6520445; doi:10.1128/mbio.00269-19), 2019-05-14

**Figure S3**

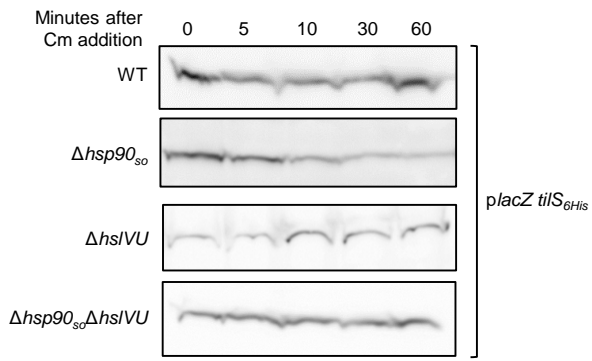

Supplement: mBio.00269-19-sf003.pdf [file mBio.00269-19-sf003.pdf]
